# Supplementary material for: Electrochemical properties of ultrafine TiO2-doped MoO3 nanoplates prepared by one-pot flame spray pyrolysis
Source: Royal Society of Chemistry journal article supplement (doi:10.1039/c4ra01780c), 2014-01-01
Supplement: c4ra01780c1.pdf [file c4ra01780c1.pdf]

## Supporting Information

### Electrochemical properties of ultrafine TiO<sub>2</sub>-doped MoO<sub>3</sub> nanoplates prepared by one-pot flame spray pyrolysis

Gi Dae Park, Seung Ho Choi, Yun Chan Kang\*

[\*] Prof. Y.C. Kang

Department of Chemical Engineering, Konkuk University, 1Hwayang-dong, Gwangjin-gu,  
Seoul 143-701 (Korea)

E-mail: yckang@konkuk.ac.kr

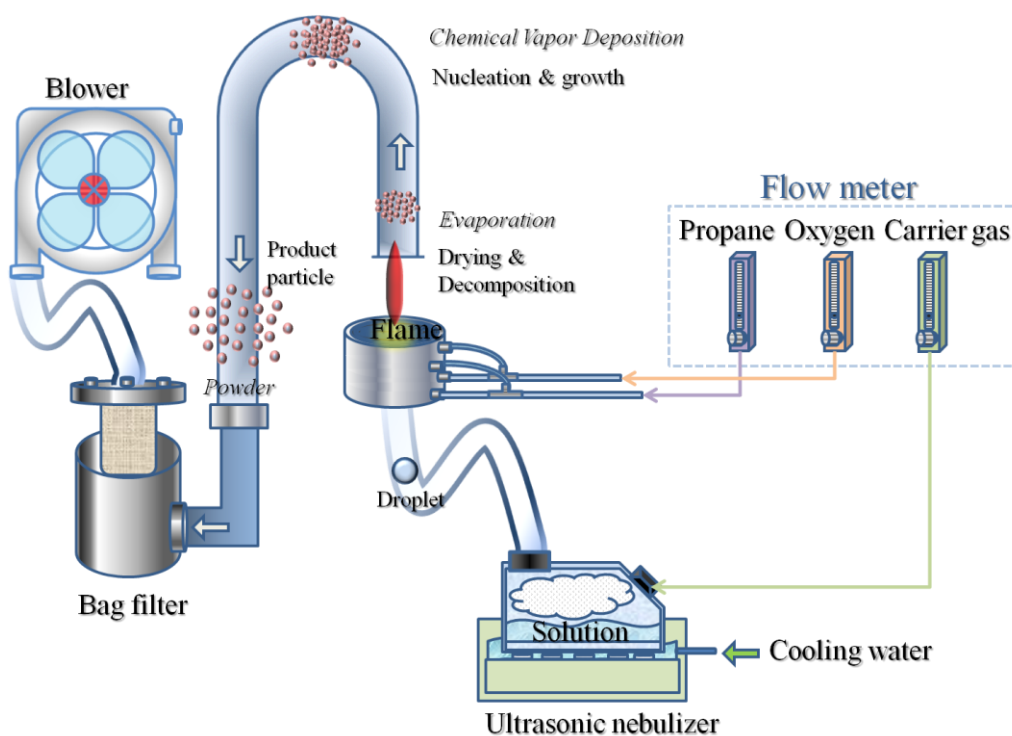

**Fig. S1** Schematic diagram of the flame spray pyrolysis process.

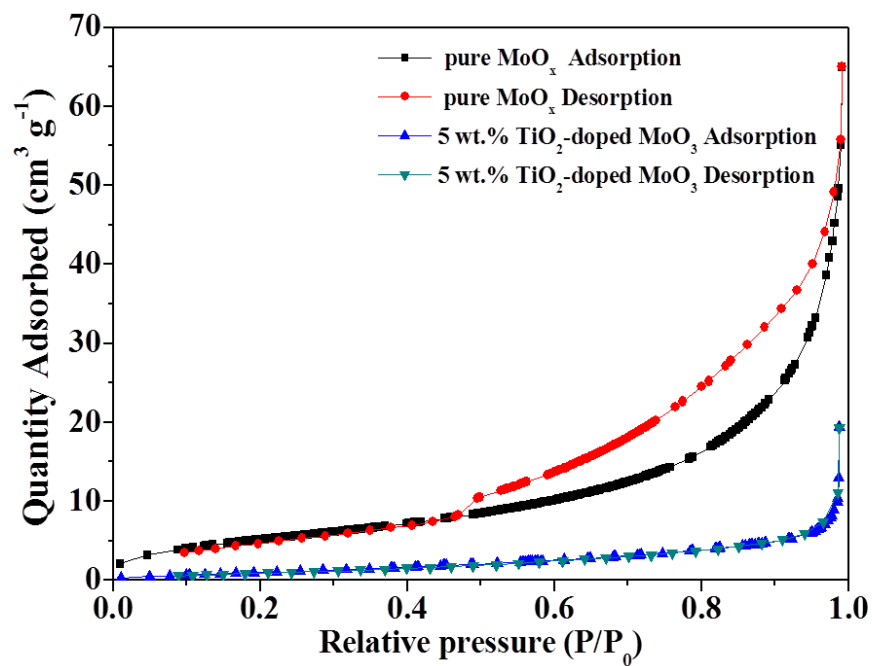

**Fig. S2** N<sub>2</sub> adsorption–desorption isotherms of the pure MoO<sub>x</sub> and TiO<sub>2</sub>-doped MoO<sub>x</sub> powders prepared by flame spray pyrolysis

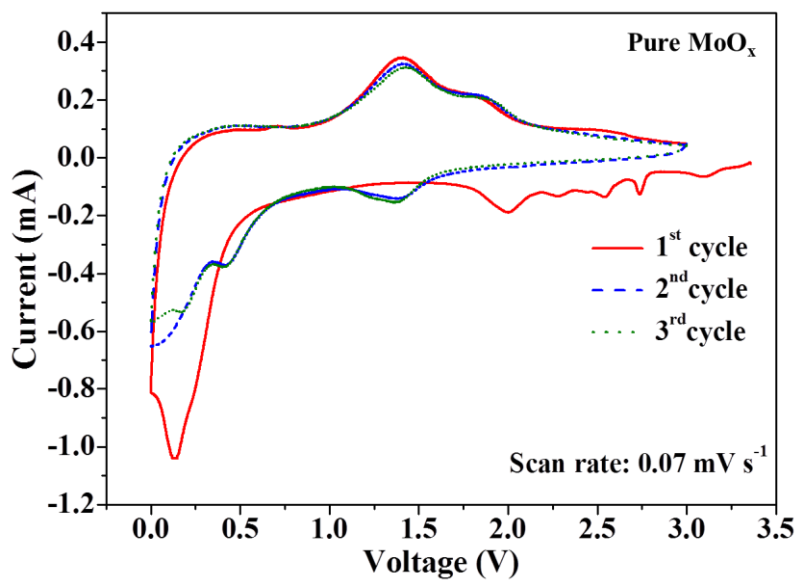

(a) pure  $\text{MoO}_x$

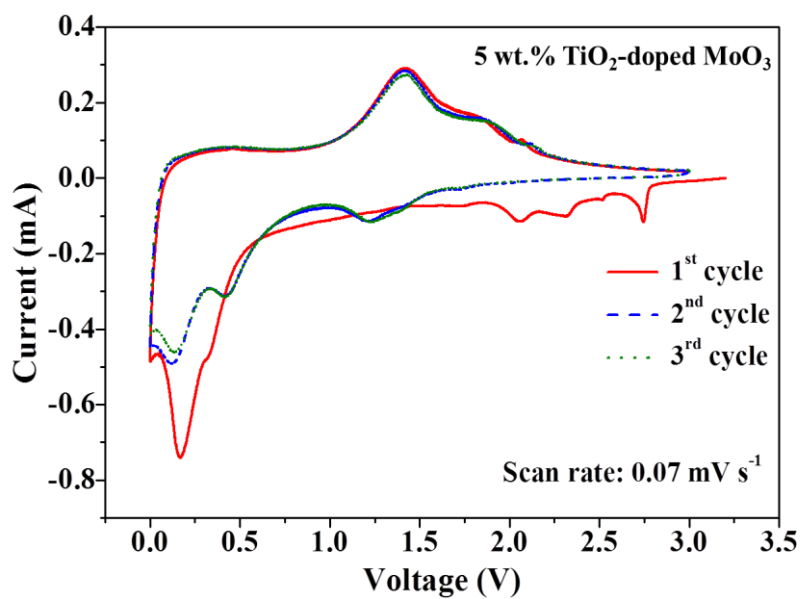

(b) 5 wt.%  $\text{TiO}_2$ -doped  $\text{MoO}_3$

**Fig. S3** Cyclic voltammogram curves of the pure  $\text{MoO}_x$  and  $\text{TiO}_2$ -doped  $\text{MoO}_x$  powders prepared by flame spray pyrolysis.
